# Supplementary material
Source: PubMed Central journal article supplement (PMC8789329)
Supplement: NIHMS1771673-supplement-1.pdf [file NIHMS1771673-supplement-1.pdf]

**Supplementary Table 1: Threshold criteria for each metabolic syndrome component<sup>1,2,3</sup>**

| <b>Age group (years)</b> | <b>Abdominal obesity (waist circumference)</b> | <b>Elevated triglycerides (or treatment of elevated triglycerides)</b> | <b>Reduced HDL-cholesterol (or treatment for lipid abnormalities)</b>     | <b>Elevated blood pressure (or treatment of diagnosed hypertension)</b> | <b>Impaired fasting glycemia (or diagnosed type 2 diabetes)</b> |
|--------------------------|------------------------------------------------|------------------------------------------------------------------------|---------------------------------------------------------------------------|-------------------------------------------------------------------------|-----------------------------------------------------------------|
| 10-<16                   | ≥90 <sup>th</sup> percentile                   | ≥1.7 mmol/L (≥150 mg/dL)                                               | <1.03 mmol/L (<40 mg/dL)                                                  | SBP ≥130 mm Hg or DBP ≥85 mm Hg                                         | ≥5.6 mmol/L (≥100 mg/dL)                                        |
| ≥16                      | ≥94 cm for males<br>≥80 cm for females         | ≥1.7 mmol/L (≥150 mg/dL)                                               | <1.03 mmol/L (<40 mg/dL) in males<br><1.29 mmol/L (<50 mg/dL) in females) | SBP ≥130 mm Hg or DBP ≥85 mm Hg                                         | ≥5.6 mmol/L (≥100 mg/dL)                                        |

Abbreviations: HDL – high-density lipoprotein; SBP – systolic blood pressure; DBP – diastolic blood pressure

<sup>1</sup>Zimmet P, Alberti KGM, Kaufman F, Tajima N, Silink M, Arslanian S, et al. The metabolic syndrome in children and adolescents - an IDF consensus report. *Pediatr Diabetes* 2007; 8:299–306.

<sup>2</sup>Alberti KGMM, Zimmet P, Shaw J. Metabolic syndrome--a new world-wide definition. A Consensus Statement from the International Diabetes Federation. *Diabet Med* 2006; 23:469–480.

<sup>3</sup>Alberti KGMM, Eckel RH, Grundy SM, Zimmet PZ, Cleeman JI, Donato KA, et al. Harmonizing the metabolic syndrome: a joint interim statement of the International Diabetes Federation Task Force on Epidemiology and Prevention; National Heart, Lung, and Blood Institute; American Heart Association; World Heart Federation; International Atherosclerosis Society; and International Association for the Study of Obesity. *Circulation* 2009; 120:1640–1645.

**Supplementary Table 2: Unadjusted and adjusted models assessing the association of each categorical MetS component at baseline with each neurocognitive index at baseline in YPHIV and YPHEU**

| Outcome                                                      | YPHIV (N=352) |                    |         |                       |                    |         | YPHEU (N=68) |                    |         |                       |                     |         |
|--------------------------------------------------------------|---------------|--------------------|---------|-----------------------|--------------------|---------|--------------|--------------------|---------|-----------------------|---------------------|---------|
|                                                              | Unadjusted    |                    |         | Adjusted <sup>1</sup> |                    |         | Unadjusted   |                    |         | Adjusted <sup>2</sup> |                     |         |
|                                                              | N             | Estimates (95% CI) | P-value | N                     | Estimates (95% CI) | P-value | N            | Estimates (95% CI) | P-value | N                     | Estimates (95% CI)  | P-value |
| <b>Exposure 1) Abdominal obesity</b>                         |               |                    |         |                       |                    |         |              |                    |         |                       |                     |         |
| Verbal Comprehension                                         | 349           | -2.2 (-6.2, 1.9)   | 0.29    | 318                   | -2.7 (-6.6, 1.3)   | 0.19    | 68           | -2.5 (-11.3, 6.2)  | 0.57    | 65                    | -3.9 (-10.7, 2.9)   | 0.26    |
| Perceptual Reasoning                                         | 350           | -1.9 (-6.0, 2.2)   | 0.37    | 319                   | -2.7 (-6.9, 1.4)   | 0.19    | 68           | -1.9 (-9.1, 5.4)   | 0.62    | 65                    | -1.9 (-7.8, 4.0)    | 0.53    |
| Working Memory                                               | 350           | -0.2 (-5.1, 4.6)   | 0.92    | 319                   | -1.2 (-6.1, 3.8)   | 0.64    | 68           | 3.3 (-3.2, 9.7)    | 0.32    | 65                    | 3.1 (-3.6, 9.7)     | 0.36    |
| Processing Speed                                             | 350           | -0.7 (-5.0, 3.6)   | 0.74    | 319                   | -2.5 (-6.6, 1.6)   | 0.23    | 68           | 3.8 (-0.8, 8.4)    | 0.10    | 65                    | 3.7 (-1.3, 8.7)     | 0.15    |
| Full-scale IQ                                                | 349           | -1.8 (-6.1, 2.4)   | 0.40    | 318                   | -2.9 (-7.1, 1.3)   | 0.17    | 68           | 0.7 (-6.4, 7.8)    | 0.85    | 65                    | 0.1 (-6.1, 6.3)     | 0.98    |
| <b>Exposure 2) Elevated triglycerides</b>                    |               |                    |         |                       |                    |         |              |                    |         |                       |                     |         |
| Verbal Comprehension                                         | 349           | 1.7 (-2.5, 5.9)    | 0.42    | 318                   | 1.0 (-3.0, 5.0)    | 0.61    | 68           | 1.6 (-11.1, 14.4)  | 0.80    | 65                    | -9.9 (-17.7, -2.2)  | 0.012   |
| Perceptual Reasoning                                         | 350           | 3.5 (-0.7, 7.7)    | 0.11    | 319                   | 1.4 (-2.8, 5.6)    | 0.51    | 68           | 2.7 (-7.1, 12.6)   | 0.58    | 65                    | -7.9 (-13.2, -2.5)  | 0.004   |
| Working Memory                                               | 350           | 0.4 (-4.0, 4.8)    | 0.86    | 319                   | 0.1 (-4.5, 4.6)    | 0.97    | 68           | -1.9 (-11.5, 7.7)  | 0.70    | 65                    | -6.1 (-15.8, 3.6)   | 0.22    |
| Processing Speed                                             | 350           | 2.1 (-2.0, 6.2)    | 0.32    | 319                   | 1.9 (-2.2, 6.1)    | 0.36    | 68           | 3.9 (-3.0, 10.8)   | 0.27    | 65                    | 3.7 (-3.1, 10.4)    | 0.29    |
| Full-scale IQ                                                | 349           | 2.7 (-1.8, 7.2)    | 0.24    | 318                   | 1.6 (-2.7, 6.0)    | 0.46    | 68           | 1.8 (-8.7, 12.2)   | 0.74    | 65                    | -7.5 (-14.6, -0.4)  | 0.037   |
| <b>Exposure 3) Low HDL cholesterol</b>                       |               |                    |         |                       |                    |         |              |                    |         |                       |                     |         |
| Verbal Comprehension                                         | 349           | -1.7 (-5.6, 2.2)   | 0.38    | 318                   | 2.5 (-1.6, 6.6)    | 0.23    | 68           | 6.0 (-7.6, 19.6)   | 0.39    | 65                    | 1.9 (-11.3, 15.0)   | 0.78    |
| Perceptual Reasoning                                         | 350           | -1.3 (-4.8, 2.3)   | 0.48    | 319                   | 1.1 (-3.0, 5.3)    | 0.59    | 68           | 2.8 (-8.1, 13.8)   | 0.61    | 65                    | -2.7 (-12.5, 7.2)   | 0.59    |
| Working Memory                                               | 350           | 2.9 (-1.1, 7.0)    | 0.16    | 319                   | 3.7 (-1.2, 8.5)    | 0.14    | 68           | 1.8 (-8.9, 12.6)   | 0.74    | 65                    | -1.9 (-14.2, 10.5)  | 0.77    |
| Processing Speed                                             | 350           | 1.2 (-2.6, 5.0)    | 0.54    | 319                   | 3.9 (-0.4, 8.2)    | 0.074   | 68           | 5.8 (1.3, 10.2)    | 0.012   | 65                    | 5.5 (-0.1, 11.0)    | 0.054   |
| Full-scale IQ                                                | 349           | -0.3 (-4.1, 3.5)   | 0.88    | 318                   | 3.0 (-1.3, 7.4)    | 0.17    | 68           | 5.3 (-6.1, 16.6)   | 0.36    | 65                    | 0.9 (-11.2, 13.1)   | 0.88    |
| <b>Exposure 4) Raised blood pressure</b>                     |               |                    |         |                       |                    |         |              |                    |         |                       |                     |         |
| Verbal Comprehension                                         | 349           | 2.8 (-3.7, 9.3)    | 0.40    | 318                   | 3.5 (-2.9, 9.8)    | 0.28    | 68           | 2.4 (-12.1, 16.8)  | 0.75    | 65                    | -4.6 (-18.5, 9.2)   | 0.51    |
| Perceptual Reasoning                                         | 350           | 3.8 (-2.7, 10.4)   | 0.25    | 319                   | 5.1 (-1.6, 11.8)   | 0.13    | 68           | 7.6 (-5.4, 20.5)   | 0.25    | 65                    | 6.7 (-12.0, 25.4)   | 0.48    |
| Working Memory                                               | 350           | 4.5 (-1.6, 10.7)   | 0.15    | 319                   | 4.1 (-2.7, 10.9)   | 0.24    | 68           | -3.0 (-13.2, 7.2)  | 0.56    | 65                    | -7.8 (-21.6, 6.1)   | 0.27    |
| Processing Speed                                             | 350           | 5.3 (-2.4, 13.0)   | 0.18    | 319                   | 7.5 (-1.0, 16.1)   | 0.085   | 68           | -7.2 (-14.6, 0.1)  | 0.055   | 65                    | -8.6 (-18.4, 1.2)   | 0.086   |
| Full-scale IQ                                                | 349           | 4.7 (-2.1, 11.4)   | 0.17    | 318                   | 5.7 (-1.5, 12.8)   | 0.12    | 68           | 0.5 (-10.4, 11.5)  | 0.92    | 65                    | -4.4 (-17.2, 8.4)   | 0.50    |
| <b>Exposure 5) Impaired fasting glycemia</b>                 |               |                    |         |                       |                    |         |              |                    |         |                       |                     |         |
| Verbal Comprehension                                         | 349           | -1.0 (-15.0, 13.1) | 0.89    | 318                   | -3.2 (-16.7, 10.2) | 0.64    | 68           | -10.5 (-23.8, 2.8) | 0.12    | 65                    | -12.7 (-24.7, -0.7) | 0.038   |
| Perceptual Reasoning                                         | 350           | -1.1 (-9.9, 7.7)   | 0.81    | 319                   | -4.7 (-14.0, 4.7)  | 0.33    | 68           | -2.0 (-16.4, 12.4) | 0.78    | 65                    | -2.5 (-14.4, 9.4)   | 0.68    |
| Working Memory                                               | 350           | -1.4 (-15.1, 12.3) | 0.84    | 319                   | -2.5 (-16.1, 11.0) | 0.71    | 68           | -0.8 (-12.0, 10.4) | 0.89    | 65                    | -3.2 (-15.3, 8.9)   | 0.60    |
| Processing Speed                                             | 350           | 8.7 (-3.8, 21.1)   | 0.17    | 319                   | 8.0 (-3.5, 19.6)   | 0.17    | 68           | -3.5 (-10.5, 3.6)  | 0.34    | 65                    | -5.0 (-13.6, 3.7)   | 0.26    |
| Full-scale IQ                                                | 349           | 1.6 (-12.6, 15.8)  | 0.82    | 318                   | -1.0 (-14.9, 12.9) | 0.89    | 68           | -5.8 (-16.7, 5.1)  | 0.30    | 65                    | -7.9 (-17.4, 1.7)   | 0.11    |
| <b>Exposure 6) Fulfilled criteria for ≥2 MetS components</b> |               |                    |         |                       |                    |         |              |                    |         |                       |                     |         |
| Verbal Comprehension                                         | 349           | -0.6 (-4.9, 3.8)   | 0.80    | 318                   | 0.2 (-4.1, 4.6)    | 0.92    | 68           | 3.2 (-8.3, 14.7)   | 0.59    | 65                    | -4.2 (-14.7, 6.4)   | 0.44    |

| Outcome              | YPHIV (N=352) |                    |         |                       |                    |         | YPHEU (N=68) |                    |         |                       |                    |         |
|----------------------|---------------|--------------------|---------|-----------------------|--------------------|---------|--------------|--------------------|---------|-----------------------|--------------------|---------|
|                      | Unadjusted    |                    |         | Adjusted <sup>1</sup> |                    |         | Unadjusted   |                    |         | Adjusted <sup>2</sup> |                    |         |
|                      | N             | Estimates (95% CI) | P-value | N                     | Estimates (95% CI) | P-value | N            | Estimates (95% CI) | P-value | N                     | Estimates (95% CI) | P-value |
| Perceptual Reasoning | 350           | 0.5 (-3.8, 4.9)    | 0.81    | 319                   | 0.8 (-3.9, 5.5)    | 0.74    | 68           | 3.7 (-5.2, 12.7)   | 0.41    | 65                    | -2.0 (-10.3, 6.2)  | 0.63    |
| Working Memory       | 350           | 2.9 (-2.0, 7.8)    | 0.25    | 319                   | 2.0 (-3.3, 7.2)    | 0.46    | 68           | 2.0 (-6.7, 10.7)   | 0.66    | 65                    | -1.5 (-10.6, 7.7)  | 0.75    |
| Processing Speed     | 350           | 3.4 (-1.3, 8.1)    | 0.15    | 319                   | 3.9 (-1.0, 8.8)    | 0.12    | 68           | 3.3 (-1.9, 8.6)    | 0.21    | 65                    | 3.1 (-2.6, 8.7)    | 0.29    |
| Full-scale IQ        | 349           | 1.6 (-3.0, 6.2)    | 0.50    | 318                   | 1.9 (-2.9, 6.7)    | 0.43    | 68           | 3.9 (-5.5, 13.2)   | 0.42    | 65                    | -1.9 (-11.3, 7.4)  | 0.68    |

<sup>1</sup>Models are adjusted for age at neurocognitive assessment (years), sex, race/ethnicity (NH Black vs not NH Black), primary language reported in WISC/WAIS (English vs Bilingual/Other), household income ( $\leq$ \$20,000 vs  $>$ \$20,000), Tanner stage (3-4 and 5 vs 1-2), age (years) first started HAART, nadir CD4, peak HIV RNA, and ARV use.

<sup>2</sup>Models are adjusted for age at neurocognitive assessment (years), sex, race/ethnicity (NH Black vs not NH Black), primary language reported in WISC/WAIS (English vs Bilingual/Other), household income ( $\leq$ \$20,000 vs  $>$ \$20,000), and Tanner stage (3-4 and 5 vs 1-2).

**Supplemental Table 3: Metabolic syndrome (MetS) components and neurocognitive indices at baseline from WISC-IV or WAIS-IV between YPHIV included and excluded from the longitudinal analysis**

|                                                 |              | <b>Included<br/>(N=183)</b> | <b>Excluded<br/>(N=167)</b> | <b>P-value</b> |
|-------------------------------------------------|--------------|-----------------------------|-----------------------------|----------------|
| <b>MetS components</b>                          |              |                             |                             |                |
| Abdominal obesity                               | N (%)        | 30 (16%)                    | 30 (18%)                    | 0.70           |
| Elevated triglycerides                          | N (%)        | 39 (21%)                    | 37 (22%)                    | 0.85           |
| Low HDL cholesterol                             | N (%)        | 37 (20%)                    | 37 (22%)                    | 0.66           |
| Elevated blood pressure                         | N (%)        | 16 (9%)                     | 5 (3%)                      | 0.024          |
| Impaired fasting <b>glycemia</b>                | N (%)        | 6 (3%)                      | 3 (2%)                      | 0.38           |
| Fulfilled criteria for $\geq 2$ MetS components | N (%)        | 32 (17%)                    | 20 (12%)                    | 0.15           |
| Fulfilled criteria for $\geq 3$ MetS components | N (%)        | 8 (4%)                      | 4 (2%)                      | 0.31           |
| <b>Neurocognitive indices</b>                   |              |                             |                             |                |
| Verbal Comprehension score                      | Median (IQR) | 91 (77, 98)                 | 87 (77, 96)                 | 0.18           |
|                                                 | Mean (SD)    | 88.30 (15.67)               | 86.23 (15.58)               |                |
|                                                 | Min, Max     | 45, 128                     | 45, 138                     |                |
| Perceptual Reasoning score                      | Median (IQR) | 92 (82, 104)                | 90 (79, 100)                | 0.054          |
|                                                 | Mean (SD)    | 91.83 (15.62)               | 88.47 (15.80)               |                |
|                                                 | Min, Max     | 45, 131                     | 45, 125                     |                |
| Working Memory score                            | Median (IQR) | 91 (80, 99)                 | 88 (80, 99)                 | 0.72           |
|                                                 | Mean (SD)    | 88.33 (15.85)               | 87.93 (16.27)               |                |
|                                                 | Min, Max     | 50, 135                     | 50, 132                     |                |
| Processing Speed score                          | Median (IQR) | 85 (75, 97)                 | 88 (78, 97)                 | 0.52           |
|                                                 | Mean (SD)    | 85.86 (15.74)               | 87.02 (15.40)               |                |
|                                                 | Min, Max     | 50, 128                     | 50, 121                     |                |
| Full-scale IQ score                             | Median (IQR) | 87 (76, 97)                 | 85 (76, 94)                 | 0.33           |
|                                                 | Mean (SD)    | 86.06 (16.24)               | 84.49 (15.99)               |                |
|                                                 | Min, Max     | 40, 129                     | 40, 130                     |                |

\*Chi-Square Test

\*\*Wilcoxon Test

Abbreviations: WISC-IV - Wechsler Intelligence Scale for Children, Fourth Edition; WAIS-IV - Wechsler Adult Intelligence Scale, Fourth Edition; YPHIV - youth living with perinatally-acquired HIV; HDL - high-density lipoprotein; SD – standard deviation; IQR – interquartile range
